# Supplementary material
Source: publisher figshare collection journal article supplement (https://geolsoc.figshare.com/articles/dataset/_/3454697)

**Supplementary Figure 1.** Location of Trinidad samples, with key geological, morphological, geographical features.

Pindell, J. L., Kennan, L., Wright, D. T., & Erikson, J.,

Clastic domains of sandstones in central/eastern Venezuela, Trinidad, and Barbados:  
heavy mineral and tectonic constraints on provenance and palaeogeography

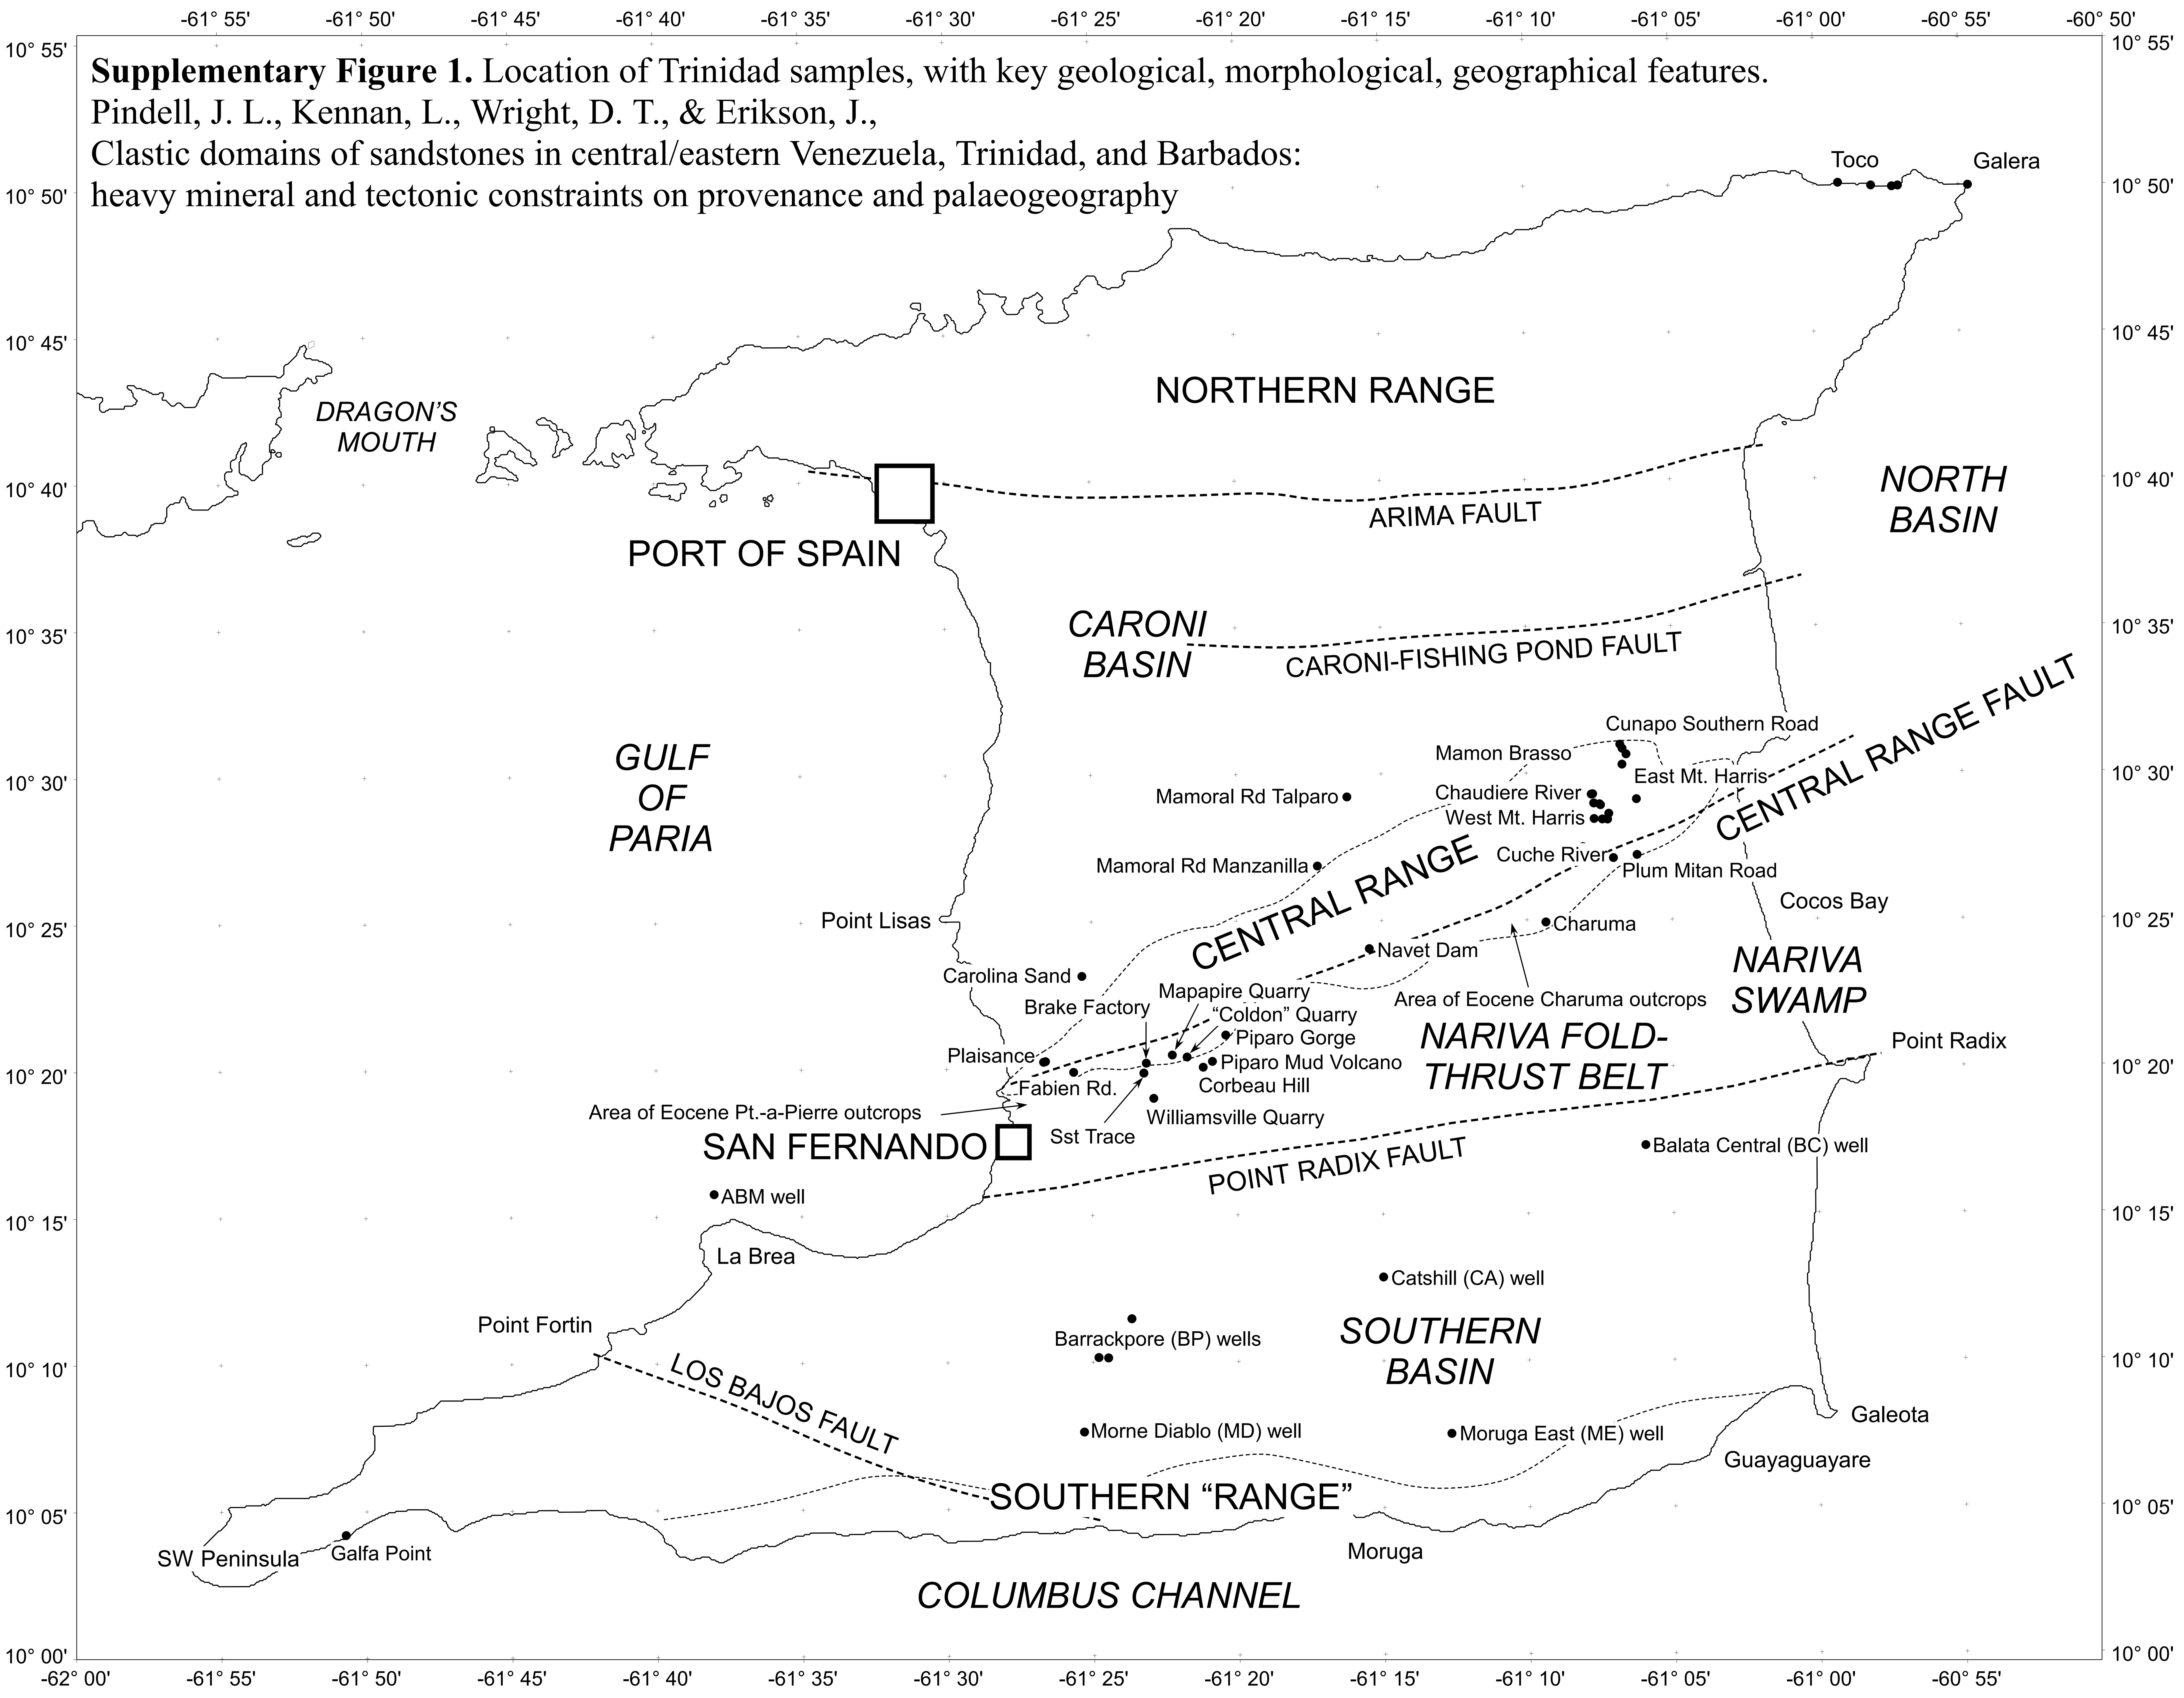

Supplement: Supplementary file 3 [file 1]
