# Supplementary material
Source: publisher figshare collection journal article supplement (https://geolsoc.figshare.com/articles/dataset/_/3454697)

Supplementary Figure 2. Location of Venezuela samples.

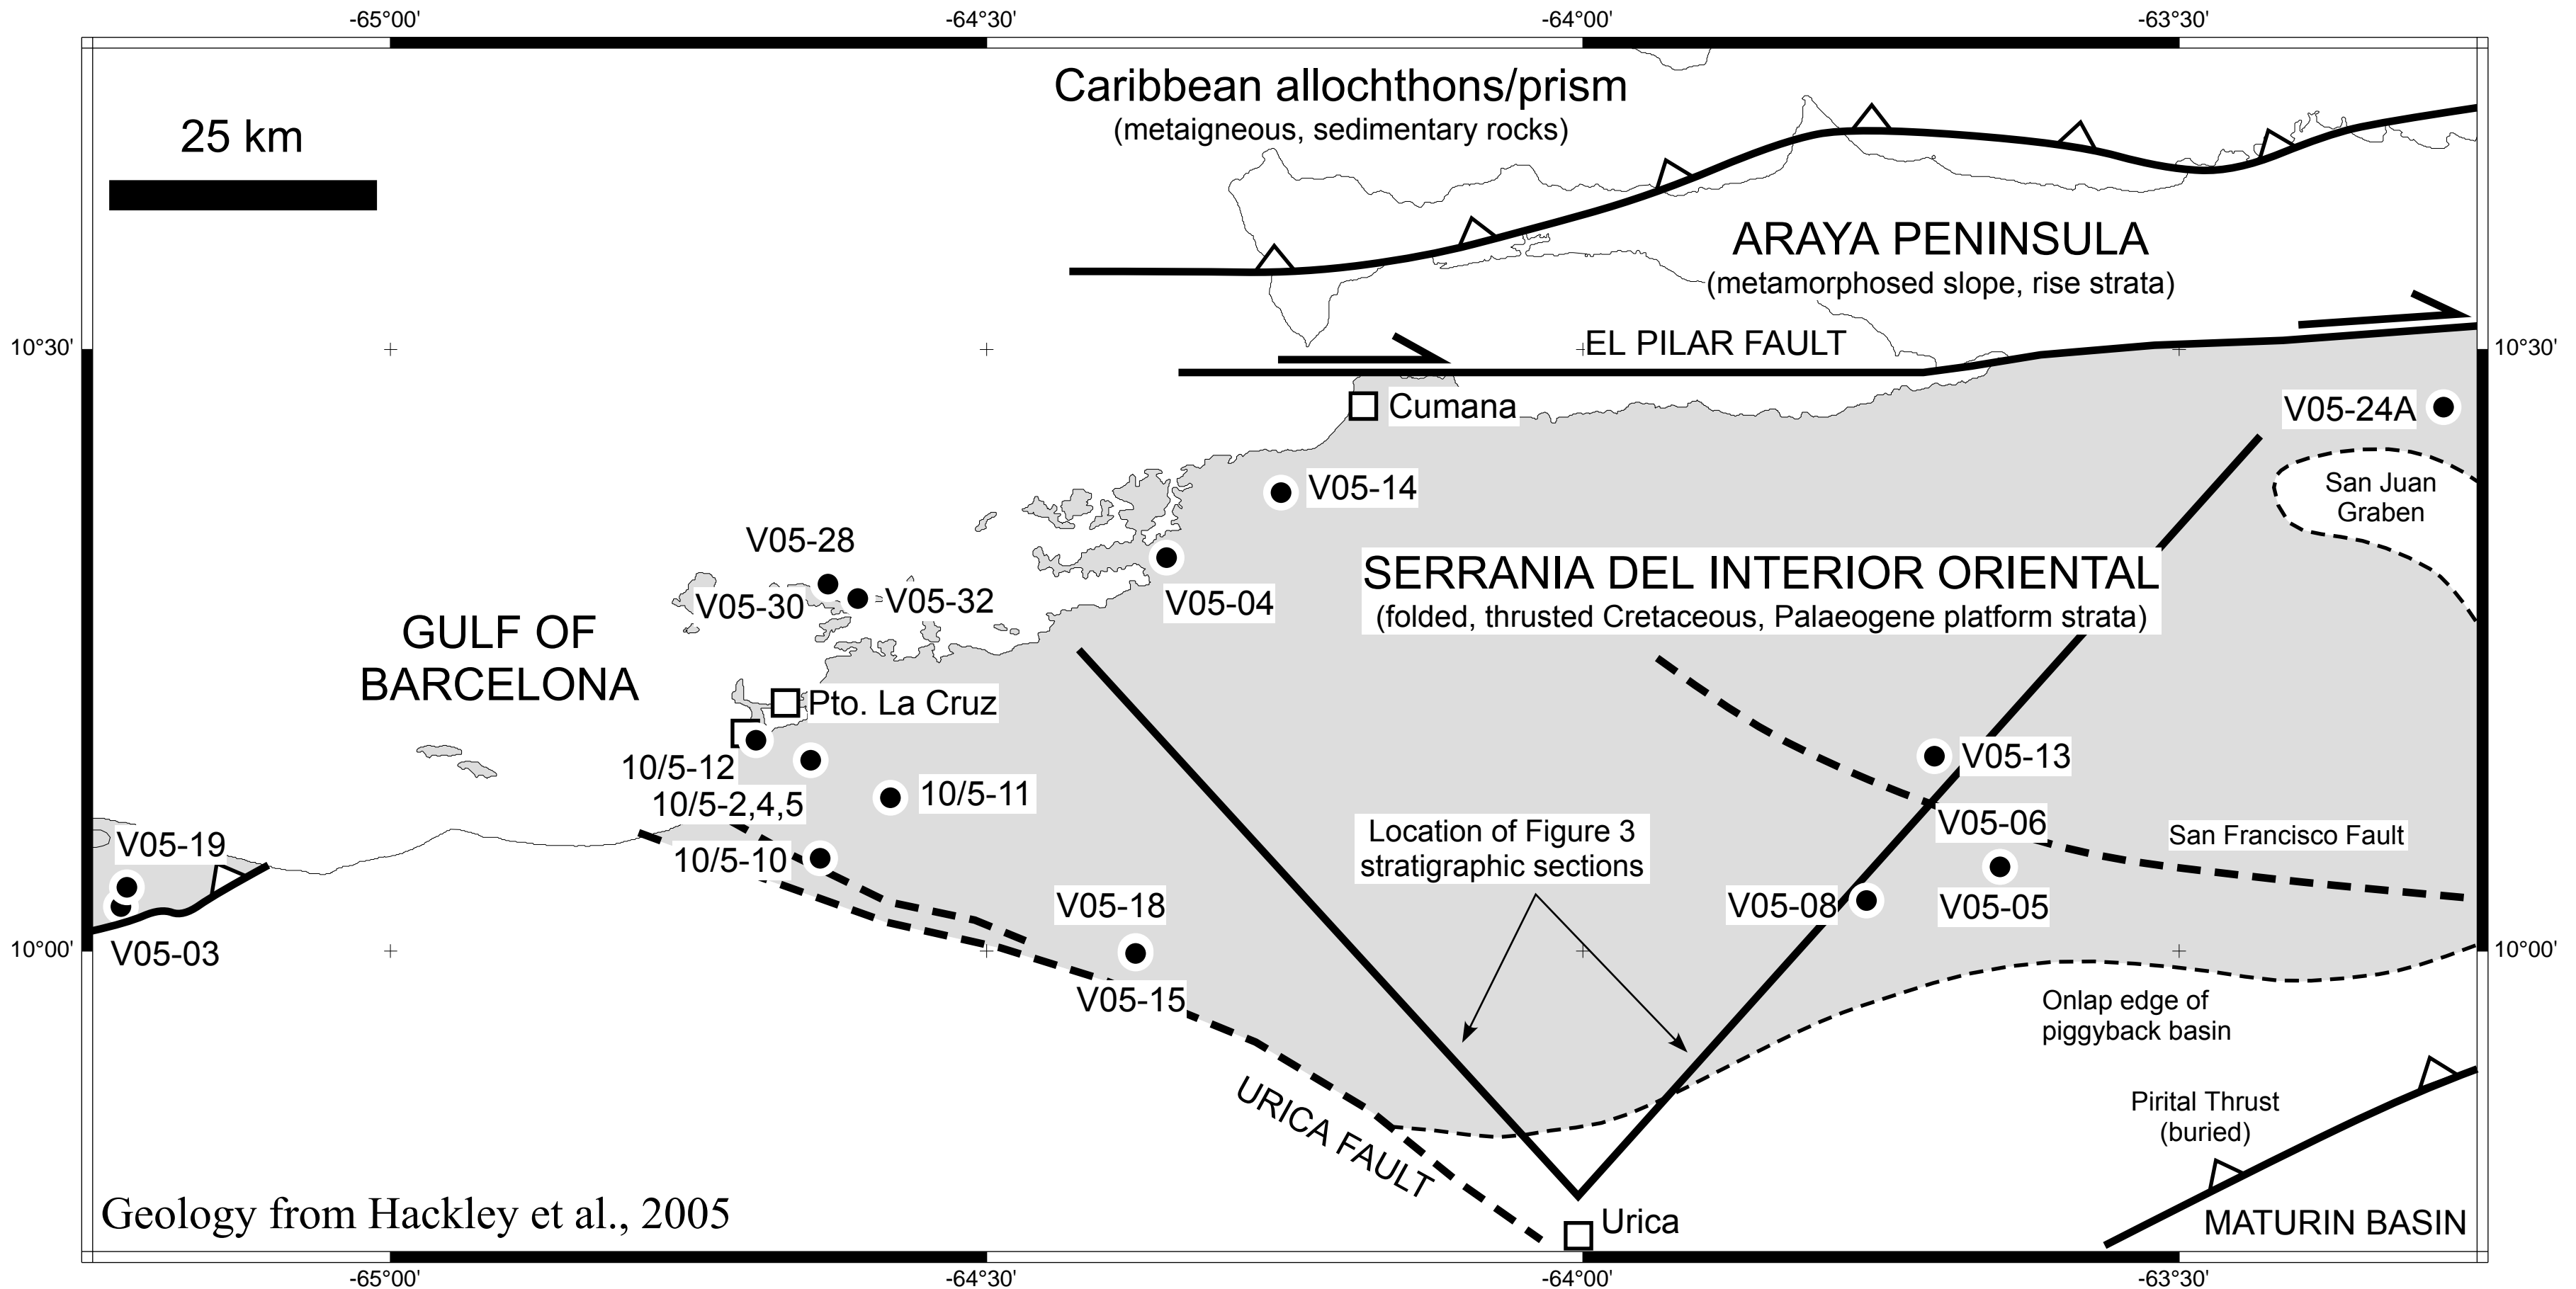

Supplement: Supplementary file 1 [file 1]

**Supplementary Figure 3.** Location of Barbados samples.

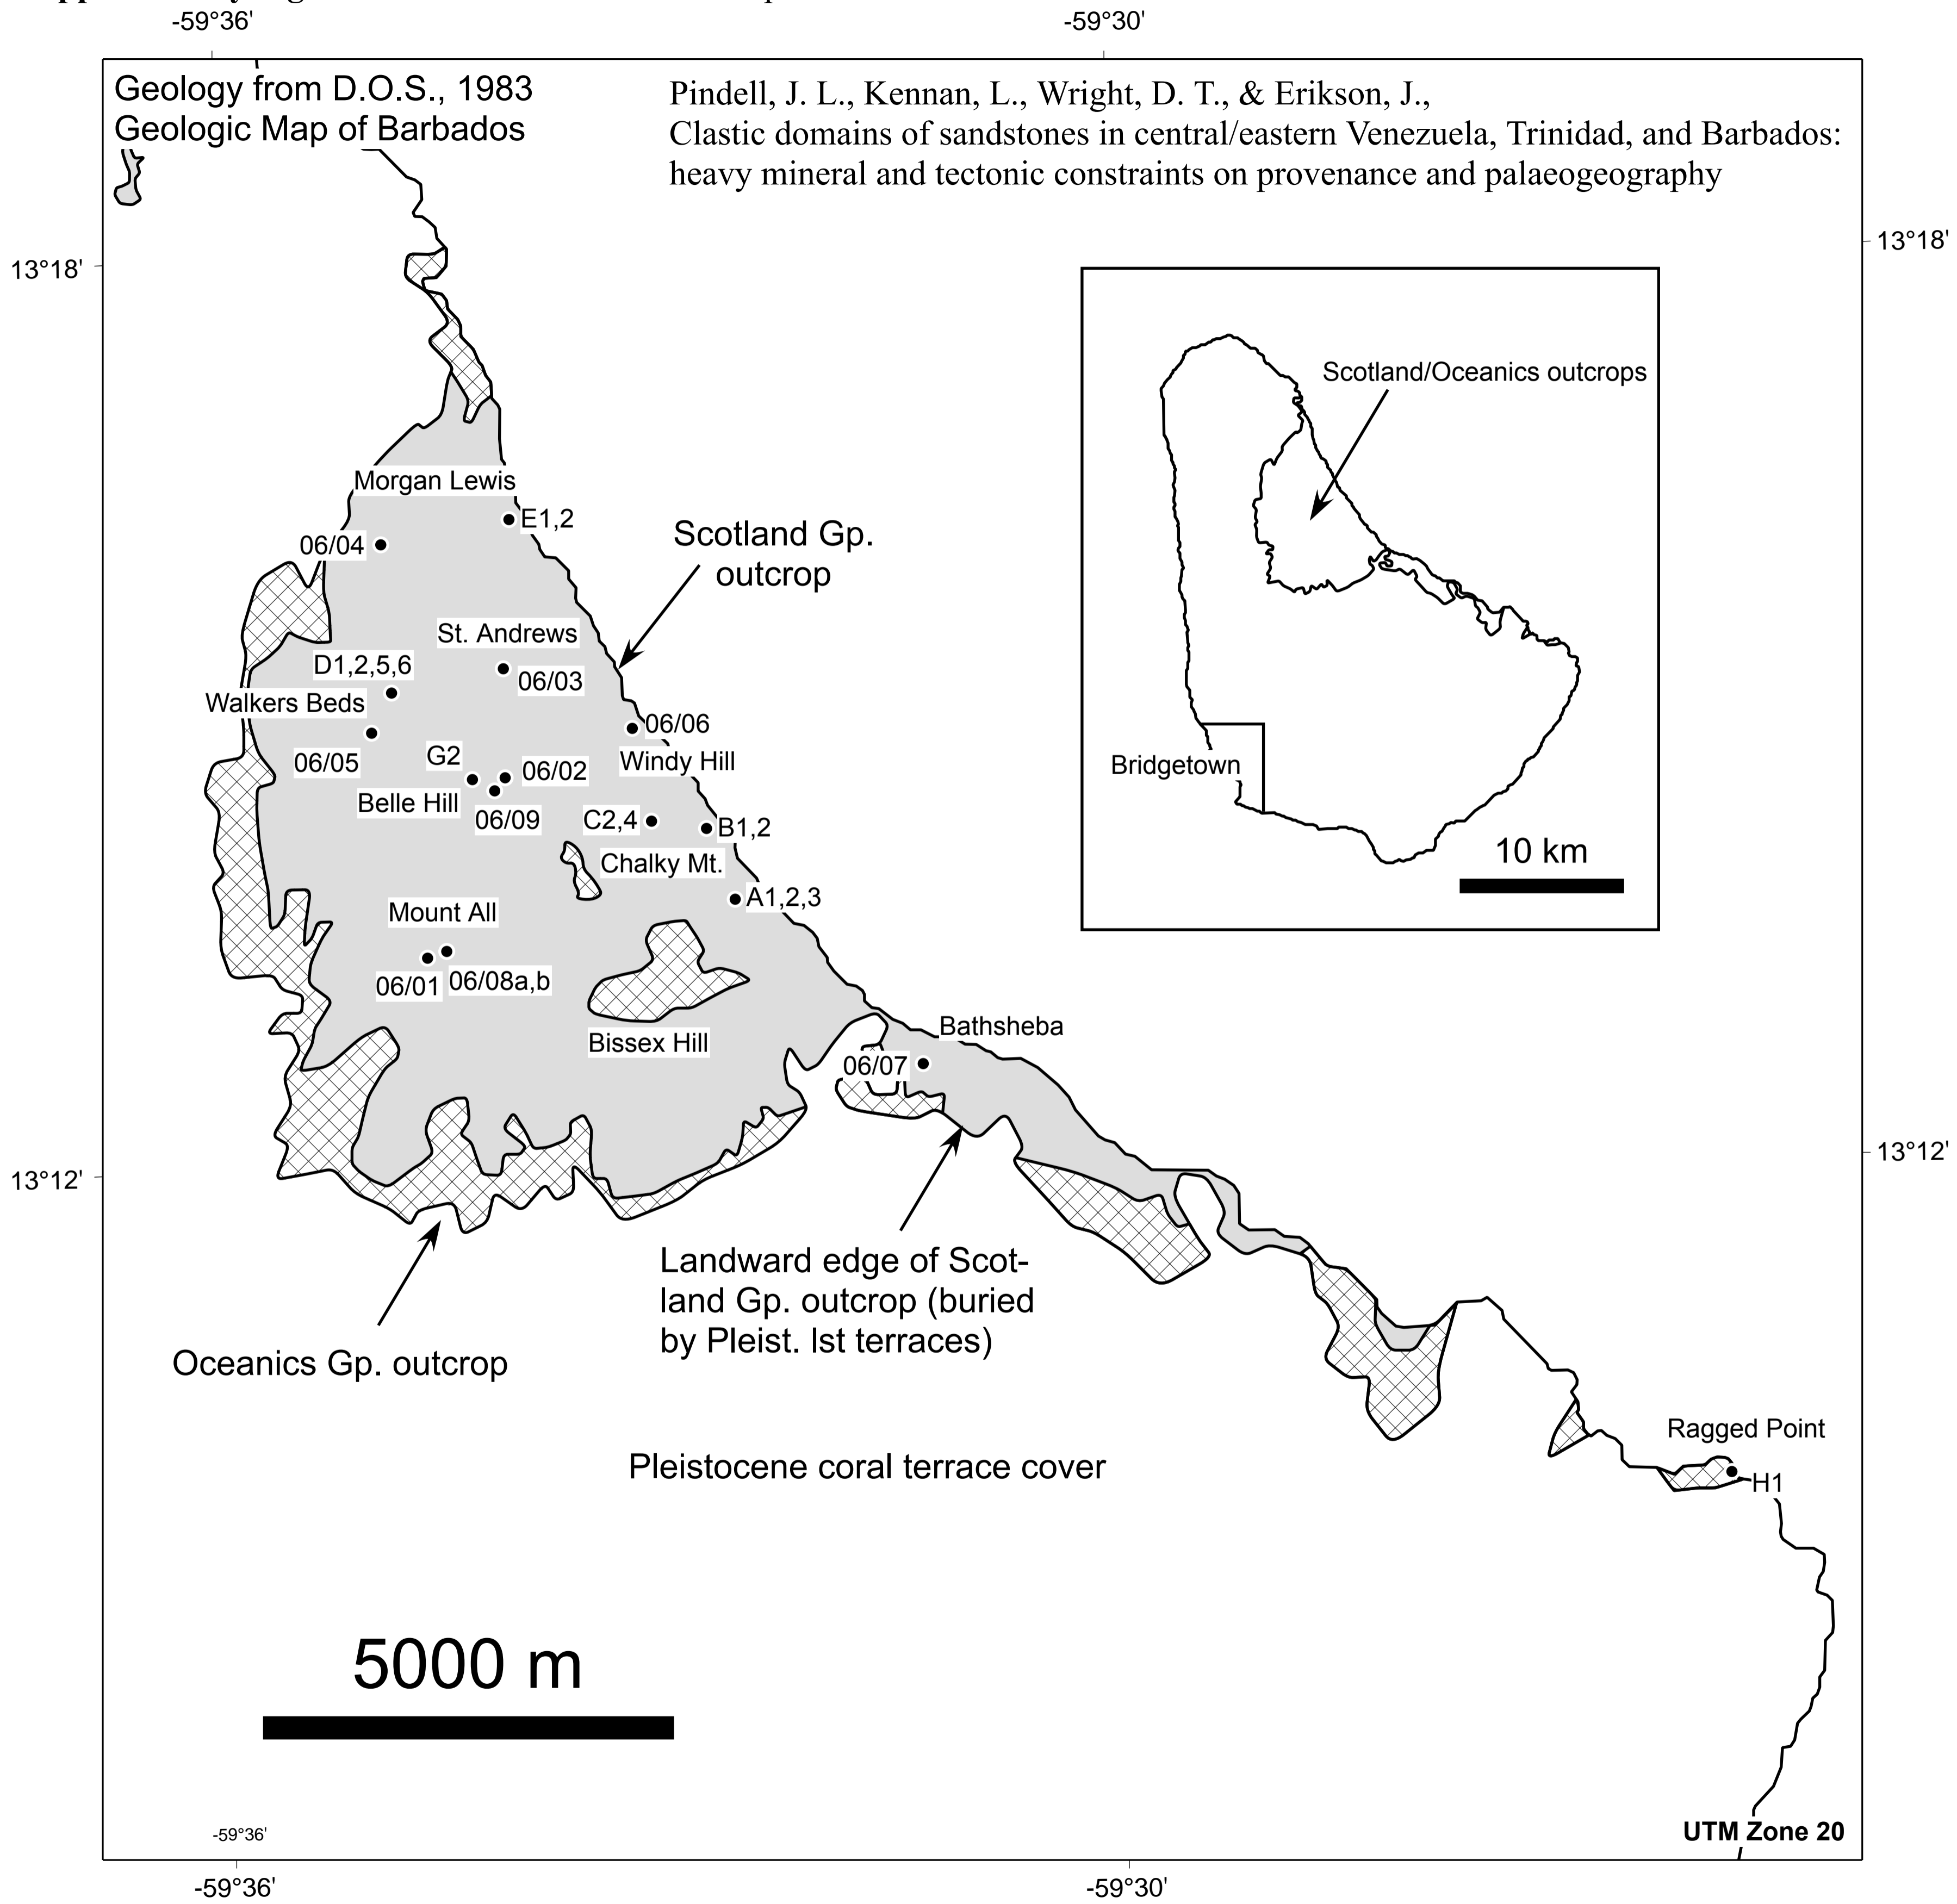

Supplement: Supplementary file 2 [file 1]
